# Supplementary material for: Knock-Out of Retrovirus Receptor Gene Tva in the Chicken Confers Resistance to Avian Leukosis Virus Subgroups A and K and Affects Cobalamin (Vitamin B12)-Dependent Level of Methylmalonic Acid
Source: MDPI journal article supplement (doi:10.3390/v13122504), 2021-12-14
Supplement: s1 [file s1]

**Supplementary Figure S1.** Amplified nucleotide sequences of potential off-targets loci. Positions of primers used for PCR amplification (underlined) and sequences complementary to gRNA (bold) are shown.

**OFF-TARGET 1**

mm4\_intron\_ESYT2\_chr2\_9588710

GAGCTGAAGTTCACCCTGCAGGGGAAGCCCGGCCTGCCGCCGCTCCGCTGCTGTCGGGCCG  
GCGGGCAGCGCCGGGCTCAGGCTAACGGCGACGGGGACGCGATGCCGGGGCGGAGGGATGCT  
CCCCGGGCTCGCCCAACATCGCACCCAGGCAGGACGTGCCCCCGGGTACGGCATCCCCGCAC  
CTCCTCCCTCCCGGCCCGCAG**CCAGCCGCTACCCGCAGGAGGGG**CCGAGGCCCCGGCCCCGCC  
CCACAGCCGCGCTGCCCGCCGGGCTCGGAGCCGCCTCGGAAGCGCCCCGAAGGGTGTGCGCCG  
CGCGCTCCCTCACTACCCACGCAGGCAGATCGGCGGAGGAGACGCTGAGCCGCACCGCCTC  
CTCCTCGTCCTCCAGGAAGGCGAGCGCCCGGCCAGGCGGGAGGTCTTGCCGCCGCGGTGCC  
GCCGGATCCAGAAGAGCCCGCACAGGGCGATGAGCACCCAGCTGAAGCTCAGCCCCAGGTA

1F GAGCTGAAGTTCACCCTGCA

1R TACCTGGGGCTGAGCTTCA

**OFF-TARGET 2**

mm4\_intergenic\_ENSGALT00000044901.2|VWA5B2\_chr9\_15903196

AAGCAGCGAACAGAACAGGAGCGGCAGAAAGTTCAGGTGCGGCTTCTAGGCTAGGGCTTTGC  
CAGCAGGGTTTGGCTGGCCCAGCCAAAGCCGAGCGAGCGTCCGGGAGAGCGACGAGCGGCTC  
TACTCCTCCTTGGCCCAGGCCGAGCCGGCGGCCCGCTGCTGCTGCAGGTGCGGAGCGACCGC  
CTCGGTGTAGAACTTCTCCAGCTTGGGACCCGTCTTCCCCAGAACTCGGCGTCAACTCCA  
CGGGCGCCACGGCCGTCTCCTTTTTTGGTGTGCACCACGAAGTCGGCGTGCTGCAGGCCGGTG  
GCCGCCAGCTGGCACTGCACCTGGGTGAAGTAGCCGTGAT**CCGCTTCAGCGCGTAGGAGTC**  
**GCCGTTTCAGCTCCAGGCAGAAAGTCCCTGTCCTTGACAGGCCTCGCGCACCGTCCTGTTGCGGT**  
GCTTGTAGGGACACTT

2F AAGCAGCGAACAGAACAGGA

2R AAGTGTCCCTACAAGCACCG

**OFF-TARGET 3**

mm4\_intron\_ENSGALT00000082879.1/ENSGALT00000074100.1\_chr10\_12351360

AAGCCCCGAGGAACTAAGGAGAAAGTGAACGAAAGGCCGATTGCACGCAGCCACCTCCAAAG  
CCACGAGCAAACCACGGCACCCAGCAGAGCCCAGGCGGGCGGTACGCCTGCAGCT**CCCTCCC**  
**AGCGGGCAGCGGTCCGT**GCCGGCAGCCGCACCCACCCCCGGCAGGGGCAGCCCCAGCCCGG  
CGGCACGGAGCTCCCATCGCCGCCTTTAGGGCAGCCCCAGCCAGCTGGGCTACAGACGAG  
GAGCCCCGGGCGGAGCGGCACCGCCTTCTCTCCTCTCTCCTCCTCCCCCGCCAGCACT  
GCCACCCCCCTCTCTCCCCGGAGGCCGTACCGTATCGCCGTTGTCTGGGGACGCTCCTCGC  
CGCCTCGGGCCGGGCTCCCAGCACCGCCAGCAGCACCAGCACCAGGGCGCAGCTCCTCGGGG  
GGCCCGCGGCCGTCCCCAGCCGGGGGGGGGCACCTGCAACACACACAG

3F AAGCCCCGAGGAACTAAGGA

3R CGTGTGTGTGTTGCAGGTG

**OFF-TARGET 4**

mm4\_intergenic\_HRH2|SPINK5\_chr13\_10537122

ACATTCCCAGCAGAAGAGGCAATTGGCTGATGCAGCGTTAGGCATTACTGCTCCCATCCCTG  
AGGAGTGTGCTTTTGTGGTTCATCCCTTGACCCAAATCACTCCTCAGTTACTCCACTCTGG  
CCAATTGCTTTCACATCCTGCTGGCACTTCTAGGACTGTATTTTATGCTCTTGAATATAACA  
TAAAGTCCT**CCCCTGCAGCGGGTAGCAATTTG**CAGCTGTATGCAAATTAAGTGC GTATTCT  
TTTCTCATGAATAATGGCCCTTGCAATGAGTTTTGAACTTTCTGCTCACTGCTCCCAAGGCA  
AGAAGAGCTCAGAGTGCAGCAAGGGGTGGGGGAGACGAGTGTGGCAGCCCCCAGACAACCAA  
ATGTGGATGAACTGTTTGCAGGACCTGGATGGCCTCCGGGAGAGCCCTCCGCTGACCGTCCT  
CCTCCGTGCATTTCA

4F ACATTCCCAGCAGAAGAGGC  
4R TGAAATGCACGGAGGAGGAC

#### OFF-TARGET 5

mm4\_intron\_DGKK\_chr4\_1853057  
TGTGCAGCTCCTTTACCTGGGAGTGAAGTGTGCTCTTTTGCTTCTGTGCCTTGTCTTCCT  
GGGCTTGGGGATGTTGAGGCGAAGCTTGAAGCTGCCCTTATTGGCACTGCTGGCACTCTCCT  
GCAAGAAACAGGGATGAGCCACCCCTACAGCCCAACAGCCCCCCCCACCACCCCTATGCG  
CCCACCTCCTCGCTGGGGTGGGCGATGGGTCCAGCCAGTGGATGTCCAGCAGCCGCTGCAG  
CTCCTGGCCCAACGCACTCAGGGGGGCCCTGCAGCGCTTCCTCCTCCTGGGGTGAGTCCAACT  
GCGGGGGACAGGGACCGTCCCCAGC**CCCCTGCCACCTGCTGGTGGGGGGGACACCTGGGCC**  
GGAGGGCTCGGGGGGGTCCCCAGCCCCACACTACCGCCTTCCCCTCCAGGAACGCTCTGGT  
CTCGGTATAGAGCGCT

5F TGTGCAGCTCCTTTACCTGG  
5R AGCGCTCTATACCGAGACCA

#### OFF-TARGET 6

mm4\_exon\_MIXL1\_chr3\_17105323  
GTTCTCCTCCCACTCCGTTCCCAGCTCCGAGAA  
GCCGCCGCCGGCCGGGAGGGGAACGCGGGGCGGGGCGGGTAGGGCCCCGCCGGGGCGCCTC  
CGCTCCCCCGTGCGGGCGCAGCGCGGAGCGGGCGGGCCGGCGGCGCGGGGCGGCCACTCGC  
GGTGCTCCTCCGGGCGCGGAGCAGCGGGGCGCGCCGCACGGCGAGCGCTGGGGCGGGGGC  
GGTGGCGGTGCGGGGGCACCCGGCCGGGGCGGTCCCCGCTGCCGGCGAGACTTGGCGCGGGC  
GTTCTGGAACCAGACCTGGGGAGAGAGGGCGGCCGTGAGGGCGCGGTGAGGGCGGGCGGCGA  
GGAGGGCGGGCACCCCTGCCCTCACCTGGATGCGGGACTCGGGGATCTGCGTGGCGTCGG  
CCAG**CCGCTCCCGCAGGTAGATGT**CGGGGTACATGGTGTCTTGGAACACCA

6F GTTCTCCTCCCACTCCGTTT  
6R TGGTGTTCAGGACACCATG

#### OFF-TARGET 7

mm4\_intergenic\_gga-mir-6560|ENSGALT00000022251.5\_chr6\_32490020  
CTAAGCTGGGCGATAGTGCATGGCAAACAAAGCCTACACCATTTTATTTATGGCTGGCTATT  
TACTTTATGCAACTCA**CCACTGCAGTGGGTATCAGTAGGG**ATTTATAACAGATTGGATTTT  
GAAATGTTTCATGTCCTCAGTGGCACACCATTTGCTTTGTCAACTTTTACATCAGTTTTTCCCG  
TGTCAGCTGGAACAGTCAGCAAACACCTAAACTTGTAGTGTGTTCCAGTTACAGGCATCT  
GTGACTTGGAACCAGTCCAAAACATGCTGATCTACAGAACCACATCCACTGCCTTGCTGATA

CTTCCAGTTCTGCTTAGTGGTCCCAGTCATAGCAAGAGGCAACAAAAGTCAAAGCACAACGC  
AAGGCCCTGCCGTGAGGAGTGAAGCATTTCCAGCAGTGTAGCACAGTG

7F CTAAGCTGGGCGATAGTGCA

7R CACTGTGCTACACTGCTGGA

**Supplementary Figure S2.** Nucleotide sequences of potential off-target sites amplified from PGC *tva* <sup>-/-</sup> clone 2 and ejaculate of recipient rooster No. 16 aligned to the NCBI chicken genome. Sequencing primers (either forward or reverse) are highlighted with green color, the gRNA complementary sequence with red color.

**OFF-TARGET 1**

|              |                                                                                     |
|--------------|-------------------------------------------------------------------------------------|
| NCBI chicken | GAGCTGAAGTTCACCTTCAGGGGAAGCCCGGCCTGCCGCCCTCCGCTGCTGTCTCGGGC                         |
| PGC          | -----                                                                               |
| ejaculate 16 | -----GGGGAAGCCCGGCCTGCCGCCCTCCGCTGCTGTCTCGGGC                                       |
|              |                                                                                     |
| NCBI chicken | CGGCGGGCAGCGCCGGGCTCAGGCTAACGGCGACGGGGACGCGATGCCGGGGCGGAGGGA                        |
| PGC          | -----                                                                               |
| ejaculate 16 | CGGCGGGCAGCGCCGGGCTCRGGCTAACGGCGACGGGGACGCGATGCCGGGGCGGAGGGA                        |
|              |                                                                                     |
| NCBI chicken | TGCTCCCCGGGCTCGCCCAACATCGCACCAGGCAGGACGTGCCCCCGGGTACGGCATCC                         |
| PGC          | -----TCGCCCAACATCGCACCAGGCAGGACGTGCCCCCGGGTACGGCATCC                                |
| ejaculate 16 | TGCTCCCCGGGCTCGCCCAACATCGCACCAGGCAGGACGTGCCCCCGGGTACGGCATCC                         |
|              | *****                                                                               |
| NCBI chicken | <b>CCGCACCTCCTCCCTCCCGGCCCGCAG</b> <b>TCAGCCGCTACCCGCAGGAGGGG</b> <b>CCGAGGCCCC</b> |
| PGC          | CCGCACCTCCTCCCTCCCGGCCCGCAGCCAGCCGCTACCCGCAGGAGGGGCCGAGGCCCC                        |
| ejaculate 16 | CCGCACCTCCTCCCTCCCGGCCCGCAGCCAGCCGCTACCCGCAGGAGGGGCCGAGGCCCC                        |
|              | *****                                                                               |
| NCBI chicken | GGCCCGCCCCACAGCCGCGCTGCCCGCCGGGCTCGGAGCCGCCTCGGAAGCGCCCGAAGG                        |
| PGC          | GGCCCGCCCCACAGCCGCGCTGCCCGCCGGGCTCGGAGCCGCCTCGGAAGCGCCCGAAGG                        |
| ejaculate 16 | GGCCCGCCCCACAGCCGCGCTGCCCGCCGGGCTCGGAGCCGCCTCGGAAGCGCCCGAAGG                        |
|              | *****                                                                               |
| NCBI chicken | GTGTTGGCCGCGCGCTCCCTCACTCACCACGCAGGCAGATCGGCGGAGGAGACGCTGAG                         |
| PGC          | GTGTTGGCCGCGCGCTCCCTCACTCACCACGCAGGCAGATCGGCGGAGGAGACGCTGAG                         |
| ejaculate 16 | GTGTTGGCCGCGCGCTCCCTCACTCACCACGCAGGCAGATCGGCGGAGGAGACGCTGAG                         |
|              | *****                                                                               |
| NCBI chicken | CCGCACCGCCTCCTCCTCGTCTCCAGGAAGGCGAGCGCCCGGCCAGGCGGGAGGTCTT                          |
| PGC          | CCGCACCGCCTCCTCCTCGTCTCCAGGAAGGCGAGCGCCCGGCCAGGCGGTGAGCGTA                          |
| ejaculate 16 | CCGCACCGCCT-----                                                                    |
|              | *****                                                                               |
| NCBI chicken | GCCGCCGCGGTGCCGCCGATCCAGAAGAGCCCGCACAGGGCGATGAGCACCAGC <b>TGAA</b>                  |
| PGC          | CGAACATCGTTAC-----                                                                  |
| ejaculate 16 | -----                                                                               |
| NCBI chicken | <b>GCTCAGCCCCAGGTA</b>                                                              |
| PGC          | -----                                                                               |
| ejaculate 16 | -----                                                                               |

**OFF-TARGET 2**

|              |                                                                      |
|--------------|----------------------------------------------------------------------|
| NCBI chicken | <b>AAGCAGCGAACAGAACAGGA</b> GCGGCAGAAAGTTCAGGTGCGGCTTCTAGGCTAGGGCTTT |
| PGC clone 2  | -----GTGCGGCTTCTAGGCTAGGGCTTT                                        |
|              | *****                                                                |
| NCBI chicken | GCCAGCAGGGTTTGCGTGGCCCAGCCAAAGCCGAGCGAGCGTCCGGGAGAGCGACGAGCG         |
| PGC clone 2  | GCCAGCAGGGTTTGCGTGGCCCAGCCAAAGCCGAGCGAGCGTCCGGGAGAGCGACGAGCG         |
|              | *****                                                                |
| NCBI chicken | GCTCTACTCCTCCTTGCGCCAGGCCGAGCCGGCGGCCCGCTGCTGCTGCAGGTGCGGAGC         |
| PGC clone 2  | GCTCTACTCCTCCTTGCGCCAGGCCGAGCCGGCGGCCCGCTGCTGCTGCAGGTGCGGAGC         |
|              | *****                                                                |

```

NCBI chicken      GACCGCCTCGGTGTAGAACTTCTCCAGCTTGGGCACCGTCTTCCCCAGAACTCGGCGTC
PGC clone 2       GACCGCCTCGGTGTAGAACTTCTCCAGCTTGGGCACCGTCTTCCCCAGAACTCGGCGTC
                  *****

```

NCBI chicken CAGGCCGGTGGCCGCCAGCTGGCACTGCACCTGGGTGAAGTAGCCGTGATCCGCTTCAG  
PGC clone 2 CAGGCCGGTGGCCGCCAGCTGGCACTGCACCTGGGTGAAGTAGCCGTGATCCCGCTTCAG  
\*\*\*\*\*

```

NCBI chicken      CGTCCTGTTGCGGTGCTTGTAGGGACACTT
PGC clone 2       CGTCCTGTTG-----
                  *****

```

```

NCBI chicken      AAGCCCGAGGAACTAAGGA GAAAGTGAACGAAAGGCCGATTGCACGCAGCCACCTCCAA
PGC clone 2      -----CGATTGCACGCAGCCACCTCCAA
                  *****

```

NCBI chicken TCCCAGCGGGCAGCGGTTCGGTGCCGGCAGCCGCACCCACCCCCCGGCAGGGGCAGCCCCA  
PGC clone 2 TCCCAGCGGGCAGCGGTTCGGTGC CGGCAGCCGCACCCACCCCCCGGCAGGGGCAGCCCCA  
\*\*\*\*\*

```
NCBI chicken      CAGACGAGGAGCCCCGGGCCGGAGCGGCACCGCCTTCCTCTCCCTCTCTCCTCCTCCCC
PGC clone 2      CAGACGAGGAGCCCCGGGCCGGAGCGGCACCGCCTTCCTCTCCCTCTCTCCTCCTCCCC
                  *****
```

```

NCBI chicken      GACGCTCCTCGCCGCCCTCGGGCCGGGCTCCCAGCACC GCCAGCAGCACCAGCACCAGGGC
PGC clone 2      GACGCTCCTCGCCGCCCTCGGGCCGGGCTCCCAGCACC GCCAGCAGCACCAGCACCAGGGC
*****

```

|              |     |
|--------------|-----|
| NCBI chicken | ACG |
| PGC clone 2  | --- |

```

NCBI chicken      ACATTCCCAGCAGAAGAGGCAATTGGCTGATGCAGCGTTAGGCATTACTGCTCCCATCCC
PGC               -----CGTTAGGCATTACTGCTCCCATCCC
PGC clone 2      -----CGTTAGGCATTACTGCTCCCATCCC
                  *****

```

```

*****

NCBI chicken      CTGGCCAATTGCTTTTCACATCCTGCTGGCACTTCTAGGACTGTATTTTATGCTCTTGAAT
PGC               CTGGCCAATTGCTTTTCACATCCTGCTGGCACTTCTAGGACTGTATTTTATGCTCTTGAAT
PGC clone 2       CTGGCCAATTGCTTTTCACATCCTGCTGGCACTTCTAGGACTGTATTTTATGCTCTTGAAT
*****

NCBI chicken      ATAACATAAAGTCCTCCCTGCAGCGGGTAGCAATTGCAGCTGTATGCAAATTAAGTGC
PGC               ATAACATAAAGTCCTCCCCTGCAGCGGGTAGCAATTGCAGCTGTATGCAAATTAAGTGC
PGC clone 2       ATAACATAAAGTCCTCCCCTGCAGCGGGTAGCAATTGCAGCTGTATGCAAATTAAGTGC
*****

NCBI chicken      GTATTCCCTTTTCTCATGAATAATGGCCCTTGCAATGAGTTTGAACCTTCTGCTCACTGC
PGC               GTATTCCCTTTTCTCATGAATAATGGCCCTTGCAATGAGTTTGAACCTTCTGCTCACTGC
PGC clone 2       GTATTCCCTTTTCTCATGAATAATGGCCCTTGCAATGAGTTTGAACCTTCTGCTCACTGC
*****

NCBI chicken      TCCAAGGCAAGAAGAGCTCAGAGTGCAGCAAGGGGTGGGGGAGACGAGTGTGGCAGCCC
PGC               TCCAAGGCAAGAAGAGCTCAGAGTGCAGCAAGGGGTGGGGGAGACGAGTGTGGCAGCCC
PGC clone 2       TCCAAGGCAAGAAGAGCTCAGAGTGCAGCAAGGGGTGGGGGAGACGAGTGTGGCAGCCC
*****

NCBI chicken      CCAGACAACCAAATGTGGATGAAGTGTTCAGGACCTGGATGGCCTCCGGGAGAGCCCT
PGC               CCAGACAACCAAATGTGGATGAAGTGTTCAGGACCTGGATGGCCTCCGGGAGAGCCCT
PGC clone 2       CCAGACAACCAAATGTGGATGAAGTGTTCAGGACCTGGATGGCCTCCGGGAGAGCCCT
*****

NCBI chicken      CCGCTGACCGTCCTCCTCCGTGCATTTC
PGC               CCGCTGACC-----
PGC clone 2       CCGCTGACC-----
*****

OFF-TARGET 5
PGC clone 2       -----GCTTCTGTGCCTTGTCTCTTC
NCBI chicken      TGTGCAGCTCCTTTACCTGGGAGTGAAGTGTTCCTTTGCTTCTGTGCCTTGTCTCTTC
*****

PGC clone 2       CTGGGCTTGCGGATGTTGAGGCGAAGCTTGAAGCTGCCCTTATTGGCACTGCTGGCACTC
NCBI chicken      CTGGGCTTGCGGATGTTGAGGCGAAGCTTGAAGCTGCCCTTATTGGCACTGCTGGCACTC
*****

PGC clone 2       TCCTGCAAGAAACAGGGATGAGCCACCCCTACAGCCCAACAGCCCCCCCCACCACCC
NCBI chicken      TCCTGCAAGAAACAGGGATGAGCCACCCCTACAGCCCAACAGCCCCCCCCACCACCC
*****

PGC clone 2       TATGCGCCACCTCCTCGCTGGGGTGGGCGATGGGTCCAGCCAGTGGATGTCCAGCAGC
NCBI chicken      TATGCGCCACCTCCTCGCTGGGGTGGGCGATGGGTCCAGCCAGTGGATGTCCAGCAGC
*****

PGC clone 2       CGCTGCAGCTCCTGGCCCAATGCATTACAGGGGGCCCTGCAGCGCTTCTCCTCCTGGGGT
NCBI chicken      CGCTGCAGCTCCTGGCCCAACGCATCAGGGGGCCCTGCAGCGCTTCTCCTCCTGGGGT
*****

PGC clone 2       GAGTCCAAGTGCAGGGGACAGGGACCGTCCCCAGCCCCACTGCCACCTGCTGGTGGGGG
NCBI chicken      GAGTCCAAGTGCAGGGGACAGGGACCGTCCCCAGCCCCACTGCCACCTGCTGGTGGGGGG
*****

PGC clone 2       GACACCTGGGCGGAGGGCTCGGGGGGTCCCCAGCCCCACACTACCGCCTTCCCTCC
NCBI chicken      GACACCTGGGCGGAGGGCTCGGGGGGTCCCCAGCCCCACACTACCGCCTTCCCTCC
*****

PGC clone 2       AGGAACGCTC-----
NCBI chicken      AGGAACGCTCTGGTCTCGGTATAGAGCGCT
*****

```

# OFF-TARGET 7

|              |                                                                            |
|--------------|----------------------------------------------------------------------------|
| PGC clone 2  | -----TGGCAAACAAAGCCTACACCATTTTATTTATGGCTGGCTA                              |
| NCBI chicken | CTAAGCTGGGCGATAGTGCATGGCAAACAAAGCCTACACCATTTTATTTATGGCTGGCTA               |
| PGC          | -----TGGCAAACAAAGCCTACACCATTTTATTTATGGCTGGCTA<br>*****                     |
| PGC clone 2  | TTTACTTTATGCAACTCACCAGTGCAGTGGGTATCAGTAGGGATTTATAACAGATTGGAT               |
| NCBI chicken | TTTACTTTATGCAACTCA <b>CACCTGCAGTGGGTATCAGTAGG</b> GATTTATAACAGATTGGAT      |
| PGC          | TTTACTTTATGCAACTCACCAGTGCAGTGGGTATCAGTAGGGATTTATAACAGATTGGAT<br>*****      |
| PGC clone 2  | TTTCGAAATGTTTCATGTCCTCAGTGGCACACCATTGCTTTGTCAACTTTTACATCAGTTT              |
| NCBI chicken | TTTCGAAATGTTTCATGTCCTCAGTGGCACACCATTGCTTTGTCAACTTTTACATCAGTTT              |
| PGC          | TTTCGAAATGTTTCATGTCCTCAGTGGCACACCATTGCTTTGTCAACTTTTACATCAGTTT<br>*****     |
| PGC clone 2  | TTCCCGTGTCAGCTAGAAATAGTCAGCAAACACCTAAAACTTGTAGTGTTGTTCCAGTTAC              |
| NCBI chicken | TTCCCGTGTCAGCTGGAACAGTCAGCAAACACCTAAAACTTGTAGTGTTGTTCCAGTTAC               |
| PGC          | TTCCCGTGTCAGCTGGAACAGTCAGCAAACACCTAAAACTTGTAGTGTTGTTCCAGTTAC<br>***** ** * |
| PGC clone 2  | AGTCATCTGTGACTTGGAACCAAGTCCAAAACATGCTGATCTACAGAACCACATCCACTGC              |
| NCBI chicken | AGGCATCTGTGACTTGGAACCAAGTCCAAAACATGCTGATCTACAGAACCACATCCACTGC              |
| PGC          | AGTCATCTGTGACTTGGAACCAAGTCCAAAACATGCTGATCTACAGAACCACATCCACTGC<br>** *****  |
| PGC clone 2  | CTTGCTGGTACTGCCAGTTCTGCTTAGTGCTCCAGTCATAGCAAGAGGCAACAAAAGTC                |
| NCBI chicken | CTTGCTGATACTTCCAGTTCTGCTTAGTGCTCCAGTCATAGCAAGAGGCAACAAAAGTC                |
| PGC          | CTTGCTGGTACTTCCAGTTCTGCTTAGTGCTCCAGTCATAGCAAGAGGCAACAAAAGTC<br>***** ** *  |
| PGC clone 2  | AAAGCACAAACGCAAGG-----                                                     |
| NCBI chicken | AAAGCACAAACGCAAGGCCCTGCCGTGAGGAGTGAAGCAT <b>TCCAGCAGTGTAGCACAGTG</b>       |
| PGC          | AAAGCACAAACGCAAGG-----<br>*****                                            |

**Supplementary Table S1.** List of potential off-target sites with the highest CFD score and the core sequence of gRNA. The mismatches between gRNA and the off-target site are in bold and the protospacer adjacent motifs are in italics.

| OFF-TARGET SITE NUMBER | SEQUENCE                                          | CFD SCORE |
|------------------------|---------------------------------------------------|-----------|
| <i>tva</i>             | CCGACTGCTACCCGCTGGAG <i>TGG</i>                   | 1.00      |
| 1                      | CC <b>AGCC</b> GCTACCCGC <b>AG</b> GAG <i>GGG</i> | 0.38      |
| 2                      | <b>GCGACTCCTACGCGCTGAAG</b> <i>CGG</i>            | 0.19      |
| 3                      | CCGAC <b>CGCTG</b> CCCGCTGG <b>GA</b> <i>GGG</i>  | 0.17      |
| 4                      | CC <b>CACTGCCACCTG</b> CTGG <b>TG</b> <i>GGG</i>  | 0.16      |
| 5                      | CCGAC <b>ATCTACCTGC</b> GGGAG <i>CGG</i>          | 0.13      |
| 6                      | CC <b>TACTGATA</b> CCC <b>ACTGC</b> AG <i>TGG</i> | 0.12      |
| 7                      | CC <b>TACTGATA</b> CCC <b>ACTGC</b> AG <i>TGG</i> | 0.11      |
